# Supplementary material
Source: Royal Society of Chemistry journal article supplement (https://www.rsc.org/suppdata/cp/1999/4695/esi906068e_.doc)
Supplement: Supplementary file 1 [file esi906068e_.doc]

**Table S1** Observed and calculated rotational transition frequencies of H314NI35Cl and H314NI37Cl.

| *J*'*J*" | *K* | 2*F*1' | 2*F*2' | 2*F*' |  | 2*F*1" | 2*F*2" | 2*F*" |  | |  | |
| --- | --- | --- | --- | --- | --- | --- | --- | --- | --- | --- | --- | --- |
| 32 | 0 | 9 | 12 | 14 |  | 9 | 12 | 14 | 9098.3299 | -3.4 | 8823.7971 | -0.8 |
|  | 0 | 3 | 6 | 8 |  | 1 | 4 | 6 | 9350.8394 | -0.7 | 9076.0599 | -2.6 |
|  | 0 | 5 | 6 | 8 |  | 3 | 4 | 6 | 9388.7939 | 0.4 | 9115.7048 | 0.9 |
|  | 0 | 5 | 8 | 8 |  | 3 | 6 | 6 | - | - | 9123.3375 | -2.3 |
|  | 0 | 5 | 6 | 6 |  | 3 | 4 | 4 | 9388.7939 | -4.4 | - | - |
|  | 0 | 5 | 8 | 10 |  | 3 | 6 | 8 | 9399.0086 | 0.7 | 9123.7680 | -2.6 |
|  | 1 | 5 | 6 | 8 |  | 3 | 4 | 6 | 9475.3556 | -5.8 | 9202.6803 | -1.0 |
|  | 1 | 5 | 8 | 8 |  | 3 | 6 | 6 | 9478.4604 | -0.4 | - | - |
|  | 1 | 5 | 8 | 10 |  | 3 | 6 | 8 | 9478.6001 | -0.6 | 9202.8168 | 0.8 |
|  | 1 | 7 | 8 | 8 |  | 5 | 6 | 6 | 9503.8359 | -1.0 | 9229.3627 | -1.4 |
|  | 1 | 7 | 8 | 10 |  | 5 | 6 | 8 | 9503.8612 | 2.3 | 9229.5232 | -1.9 |
|  | 1 | 7 | 8 | 6 |  | 5 | 6 | 4 | 9503.9127 | 0.3 | 9229.4432 | 0.5 |
|  | 1 | 7 | 10 | 10 |  | 5 | 8 | 8 | 9510.8890 | 0.3 | 9234.9069 | -1.0 |
|  | 1 | 7 | 10 | 12 |  | 5 | 8 | 10 | 9511.3704 | 0.3 | 9235.3814 | -0.3 |
|  | 1 | 7 | 10 | 8 |  | 5 | 8 | 6 | 9511.4754 | -1.8 | 9235.4846 | -3.2 |
|  | 1 | 7 | 4 | 6 |  | 5 | 2 | 4 | 9511.5670 | 2.5 | 9235.6482 | -2.5 |
|  | 0 | 7 | 8 | 8 |  | 5 | 6 | 6 | 9514.4803 | 0.1 | 9239.9422 | -1.0 |
|  | 0 | 7 | 8 | 10 |  | 5 | 6 | 8 | 9514.6820 | 1.2 | 9240.1602 | 0.6 |
|  | 0 | 7 | 8 | 6 |  | 5 | 6 | 4 | 9514.7275 | -1.9 | 9240.2076 | -1.4 |
|  | 0 | 7 | 6 | 8 |  | 5 | 4 | 6 | 9521.6845 | -1.2 | 9245.0577 | -0.5 |
|  | 0 | 7 | 6 | 6 |  | 5 | 4 | 4 | 9521.7107 | 2.7 | 9244.9676 | 5.1 |
|  | 0 | 7 | 10 | 10 |  | 5 | 8 | 8 | 9523.1625 | 2.0 | 9246.5944 | 1.0 |
|  | 0 | 7 | 10 | 12 |  | 5 | 8 | 10 | 9523.6734 | 1.0 | 9247.0817 | -1.6 |
|  | 0 | 7 | 10 | 8 |  | 5 | 8 | 6 | 9523.8032 | 2.3 | 9247.2010 | 2.7 |
|  | 0 | 7 | 4 | 6 |  | 5 | 2 | 4 | 9525.6085 | 1.3 | 9248.8983 | 2.4 |
|  | 1 | 9 | 10 | 12 |  | 7 | 10 | 12 | 9559.3579 | 1.3 | - | - |
|  | 1 | 7 | 6 | 6 |  | 7 | 4 | 4 | 9561.8277 | 0.6 | 9287.7895 | -3.5 |
|  | 1 | 7 | 6 | 8 |  | 7 | 4 | 6 | 9562.1333 | 1.3 | 9288.1275 | 6.9 |
|  | 1 | 9 | 10 | 10 |  | 7 | 8 | 8 | 9562.3160 | 6.2 | 9288.0597 | 6.7 |
|  | 1 | 9 | 10 | 8 |  | 7 | 8 | 6 | 9562.3332 | -5.1 | 9288.0916b | 5.8 |
|  | 1 | 9 | 10 | 12 |  | 7 | 8 | 10 | 9562.3466 | 0.1 | 9288.0916 b | -2.6 |
|  | 1 | 9 | 8 | 8 |  | 7 | 6 | 6 | 9564.2459 | 1.1 | 9289.5612 | -0.3 |
|  | 1 | 9 | 8 | 10 |  | 7 | 6 | 8 | 9564.5961 | -0.1 | 9289.9074 | -1.4 |
|  | 1 | 9 | 8 | 6 |  | 7 | 6 | 4 | 9564.6901 | 5.9 | 9290.0041 | 0.1 |
|  | 1 | 9 | 12 | 12 |  | 7 | 10 | 10 | 9568.4678 | 0.7 | 9292.7639 | -0.2 |
|  | 1 | 9 | 12 | 14 |  | 7 | 10 | 12 | 9568.6999 | 1.9 | 9292.9922 | -0.8 |
|  | 1 | 9 | 12 | 10 |  | 7 | 10 | 8 | 9568.7597 | 0.9 | 9292.9200 | 2.7 |
|  | 1 | 7 | 8 | 10 |  | 7 | 8 | 10 | 9571.2400 | -0.2 | - | - |
|  | 1 | 7 | 8 | 8 |  | 7 | 8 | 8 | 9571.4343 | -0.4 | 9295.6875 | 1.4 |
|  | 1 | 7 | 10 | 12 |  | 7 | 8 | 10 | 9575.5488 | 1.2 | 9298.9234 | 2.9 |
|  | 1 | 3 | 6 | 8 |  | 1 | 4 | 6 | 9585.0984 | 1.6 | - | - |
|  | 0 | 1 | 4 | 6 |  | 1 | 4 | 6 | 9624.8329 | 0.6 | - | - |
|  | 0 | 1 | 4 | 6 |  | 1 | 2 | 4 | 9624.8805 | 2.2 | 9349.8668 | -2.7 |
|  | 0 | 1 | 2 | 4 |  | 1 | 4 | 6 | 9625.0812 | 0.3 | 9349.9955 | 0.6 |
|  | 0 | 11 | 10 | 10 |  | 9 | 8 | 8 | 9663.4671 | 1.4 | 9388.8246 | 6.8 |
|  | 0 | 11 | 10 | 12 |  | 9 | 8 | 10 | 9663.6132 b | 0.2 | 9388.9671 b | 3.3 |
|  | 0 | 11 | 10 | 8 |  | 9 | 8 | 6 | 9663.6132 b | 0.5 | 9388.9671 b | 3.1 |
|  | 0 | 11 | 12 | 12 |  | 9 | 10 | 10 | 9663.8369 | 1.4 | 9389.1008 | -0.4 |
|  | 0 | 11 | 12 | 10 |  | 9 | 10 | 8 | 9663.9662 b | 0.9 | 9389.2319 b | 1.3 |
|  | 0 | 11 | 12 | 14 |  | 9 | 10 | 12 | 9663.9662 b | -0.3 | 9389.2319 b | -0.5 |
|  | 0 | 11 | 8 | 8 |  | 9 | 6 | 6 | 9665.0518 | 1.0 | 9390.0779 | 0.5 |
|  | 0 | 11 | 8 | 6 |  | 9 | 6 | 4 | 9665.1733 | -3.1 | - | - |
|  | 0 | 11 | 8 | 10 |  | 9 | 6 | 8 | 9665.1995 | 1.6 | 9390.2212 | -0.7 |
|  | 0 | 11 | 14 | 14 |  | 9 | 12 | 12 | 9665.4695 | 1.0 | 9390.3869 | -2.2 |
|  | 0 | 11 | 14 | 12 |  | 9 | 12 | 10 | 9665.5804 | 2.2 | 9390.4996 | 1.0 |

Table S1 (continued)

| *J*'*J*" | *K* | 2*F*1' | 2*F*2' | 2*F*' |  | 2*F*1" | 2*F*2" | 2*F*" |  | |  | |
| --- | --- | --- | --- | --- | --- | --- | --- | --- | --- | --- | --- | --- |
| 32 | 0 | 11 | 14 | 16 |  | 9 | 12 | 14 | - |  | 9390.4996 | -2.3 |
|  | 0 | 9 | 10 | 10 |  | 7 | 8 | 8 | 9687.2208 | -0.4 | 9413.5544 | -0.6 |
|  | 0 | 9 | 10 | 12 |  | 7 | 8 | 10 | 9687.4268 | 0.4 | 9413.7800 | 0.4 |
|  | 0 | 9 | 10 | 8 |  | 7 | 8 | 6 | 9687.4563 | -2.0 | 9413.8134 | -0.9 |
|  | 0 | 9 | 8 | 8 |  | 7 | 6 | 6 | 9689.9620 | 0.7 | 9415.5829 | -0.7 |
|  | 0 | 9 | 8 | 10 |  | 7 | 6 | 8 | 9690.3290 | -1.5 | 9415.9361 | -1.4 |
|  | 0 | 9 | 8 | 6 |  | 7 | 6 | 4 | 9690.4100 | 0.9 | 9416.0094 | -2.3 |
|  | 0 | 9 | 6 | 6 |  | 7 | 4 | 4 | 9692.7629 | -0.3 | 9418.3780 | 1.8 |
|  | 0 | 9 | 6 | 8 |  | 7 | 4 | 6 | 9693.2478 | 0.4 | 9418.8410 | -1.3 |
|  | 0 | 9 | 6 | 4 |  | 7 | 4 | 2 | 9693.3892 | 1.1 | 9418.9756 | -1.2 |
|  | 0 | 9 | 12 | 12 |  | 7 | 10 | 10 | 9694.7002 | -4.8 | 9419.2549 | -0.1 |
|  | 0 | 9 | 12 | 14 |  | 7 | 10 | 12 | 9695.0660 | 2.3 | 9419.6143 | 2.1 |
|  | 0 | 9 | 12 | 10 |  | 7 | 10 | 8 | 9695.1142 | -0.8 | 9419.6634 | -0.3 |
|  | 1 | 11 | 12 | 12 |  | 9 | 10 | 10 | 9711.4756 | -0.6 | 9437.3046 | -1.3 |
|  | 1 | 1 | 12 | 14 |  | 9 | 10 | 12 | 9711.7530 | -0.9 | 9437.5827 | -1.4 |
|  | 1 | 11 | 12 | 10 |  | 9 | 10 | 8 | 9711.7807 | -3.6 | 9437.6132 | 0.9 |
|  | 1 | 11 | 10 | 10 |  | 9 | 8 | 8 | 9712.3542 | -1.2 | 9438.0129 | -1.6 |
|  | 1 | 11 | 10 | 12 |  | 9 | 8 | 10 | 9712.6243 | -0.4 | 9438.2809 | -0.9 |
|  | 1 | 11 | 10 | 8 |  | 9 | 8 | 6 | 9712.6607 | -2.3 | 9438.3173 | -2.3 |
|  | 0 | 7 | 8 | 10 |  | 7 | 8 | 10 | 9712.9759 | -5.1 | 9438.6951 b | -1.6 |
|  | 0 | 7 | 8 | 8 |  | 7 | 8 | 8 | 9713.0051 | 5.1 | 9438.6951 b | -2.9 |
|  | 0 | 7 | 10 | 10 |  | 7 | 10 | 10 | 9715.6144 | -1.2 | 9440.6205 | -1.3 |
|  | 0 | 7 | 10 | 12 |  | 7 | 10 | 12 | 9715.8341 | 0.5 | 9440.8161 | -0.6 |
|  | 1 | 11 | 14 | 14 |  | 9 | 12 | 12 | 9716.2915 | 0.1 | 9441.1107 | 0.2 |
|  | 1 | 11 | 14 | 16 |  | 9 | 12 | 14 | 9716.5824 | 0.7 | 9441.3990 | -0.2 |
|  | 1 | 11 | 14 | 12 |  | 9 | 12 | 10 | 9716.6145 | -1.1 | 9441.4349 | 0.2 |
|  | 0 | 7 | 12 | 8 |  | 7 | 6 | 8 | 9717.1490 | -0.6 | - | - |
|  | 1 | 11 | 8 | 8 |  | 9 | 6 | 6 | 9717.1766 | -0.4 | 9441.8175 | 0.4 |
|  | 1 | 11 | 8 | 10 |  | 9 | 6 | 8 | 9717.4597 | -1.3 | 9442.1043 | 3.5 |
|  | 1 | 11 | 8 | 6 |  | 9 | 6 | 4 | 9717.5040 | -3.1 | 9442.1451 | -1.7 |
|  | 1 | 5 | 8 | 8 |  | 5 | 8 | 8 | 9728.1368 | 0.7 | 9453.1439 | 2.7 |
|  | 1 | 5 | 8 | 10 |  | 5 | 8 | 10 | 9728.2828 | -0.4 | 9453.2917 | 1.2 |
|  | 1 | 3 | 6 | 8 |  | 3 | 6 | 8 | 9746.4822 | 1.3 | 9470.7910 | 1.3 |
|  | 0 | 3 | 6 | 6 |  | 3 | 6 | 6 | 9749.3834 | -1.9 | 9474.1117 | -00.3 |
|  | 0 | 3 | 6 | 8 |  | 3 | 6 | 8 | 9749.7100 | -3.4 | 9474.4376 | -2.1 |
|  | 1 | 1 | 2 | 4 |  | 1 | 4 | 6 | 9788.1717 | 2.1 | 9513.3937 | 2.2 |
|  | 0 | 5 | 6 | 8 |  | 5 | 6 | 8 | 9801.5151 | -1.2 | 9526.5200 | 0.3 |
|  | 0 | 5 | 8 | 8 |  | 5 | 8 | 8 | - |  | 9529.5836 | -2.7 |
|  | 0 | 5 | 8 | 10 |  | 5 | 8 | 10 | 9805.7057 | -0.8 | 9529.7902 | 0.8 |
|  | 0 | 5 | 8 | 6 |  | 5 | 8 | 6 | 9805.7639 | -1.4 | 9529.8468 | -1.4 |
| 43 | 0 | 5 | 6 | 6 |  | 3 | 4 | 4 | 12710.4441 | -0.4 | - | - |
|  | 0 | 5 | 6 | 8 |  | 3 | 4 | 6 | 12710.6266 | -1.8 | - | - |
|  | 0 | 5 | 4 | 6 |  | 3 | 2 | 4 | 12716.7027 | -2.6 | - | - |
|  | 0 | 5 | 8 | 8 |  | 3 | 6 | 6 | 12718.6423 | 1.3 | - | - |
|  | 0 | 5 | 8 | 10 |  | 3 | 6 | 8 | 12719.0416 | 2.4 | - | - |
|  | 0 | 5 | 8 | 6 |  | 3 | 6 | 4 | 12719.1346 | -2.4 | - | - |
|  | 0 | 7 | 8 | 8 |  | 5 | 6 | 6 | 12732.0119 | 0.2 | - | - |
|  | 0 | 7 | 8 | 10 |  | 5 | 6 | 8 | 12732.2797 | -0.8 | - | - |
|  | 0 | 7 | 8 | 6 |  | 5 | 6 | 4 | 12732.3458 | 3.5 | - | - |
|  | 0 | 7 | 6 | 6 |  | 5 | 4 | 4 | 12734.7551 | -5.7 | - | - |
|  | 0 | 7 | 6 | 8 |  | 5 | 4 | 6 | 12734.9848 | 0.4 | - | - |
|  | 0 | 7 | 6 | 4 |  | 5 | 4 | 2 | 12735.0558 | 0.5 | - | - |
|  | 0 | 7 | 10 | 10 |  | 5 | 8 | 8 | 12738.3156 | 0.2 | - | - |
|  | 0 | 7 | 10 | 12 |  | 5 | 8 | 10 | 12738.6568 | 0.1 | - | - |
|  | 0 | 7 | 10 | 8 |  | 5 | 8 | 6 | 12738.7221 | -4.3 | - | - |
|  | 0 | 7 | 4 | 6 |  | 5 | 2 | 4 | 12741.0626 | 2.7 | - | - |

Table S1 (continued)

| *J*'*J*" | *K* | 2*F*1' | 2*F*2' | 2*F*' |  | 2*F*1" | 2*F*2" | 2*F*" |  | |  | |
| --- | --- | --- | --- | --- | --- | --- | --- | --- | --- | --- | --- | --- |
| 43 | 1 | 7 | 8 | 8 |  | 5 | 6 | 6 | 12742.8556 | 0.4 | - | - |
|  | 1 | 7 | 8 | 10 |  | 5 | 6 | 8 | 12743.0864 | 0.1 | - | - |
|  | 1 | 7 | 8 | 6 |  | 5 | 6 | 4 | 12743.1367 | -0.3 | - | - |
|  | 1 | 7 | 6 | 6 |  | 5 | 4 | 4 | 12745.3040 | -0.1 | - | - |
|  | 1 | 7 | 6 | 8 |  | 5 | 4 | 6 | 12745.4893 | 2.2 | - | - |
|  | 1 | 7 | 10 | 10 |  | 5 | 8 | 8 | 12748.3895 | -2.0 | - | - |
|  | 1 | 7 | 10 | 12 |  | 5 | 8 | 10 | 12748.6917 | 1.2 | - | - |
|  | 1 | 7 | 10 | 8 |  | 5 | 8 | 6 | 12748.7532 | -4.9 | - | - |
|  | 1 | 7 | 4 | 6 |  | 5 | 2 | 4 | 12750.7812 | -2.4 | - | - |
|  | 1 | 5 | 6 | 6 |  | 3 | 4 | 4 | 12757.9865 | -4.2 | - | - |
|  | 1 | 5 | 6 | 8 |  | 3 | 4 | 6 | 12758.1400 | 1.2 | - | - |
|  | 1 | 5 | 4 | 6 |  | 3 | 2 | 4 | 12763.1063 | -1.6 | - | - |
|  | 1 | 5 | 8 | 8 |  | 3 | 6 | 6 | 12764.7660 | 3.2 | - | - |
|  | 1 | 5 | 8 | 10 |  | 3 | 6 | 8 | 12765.0924 | -0.7 | - | - |
|  | 1 | 5 | 8 | 6 |  | 3 | 6 | 4 | 12765.1673 | -3.4 | - | - |
|  | 0 | 3 | 6 | 6 |  | 1 | 4 | 4 | 12770.5493 | -6.5 | - | - |
|  | 0 | 3 | 6 | 8 |  | 1 | 4 | 6 | 12770.9824 | 2.3 | - | - |
|  | 1 | 9 | 10 | 10 |  | 7 | 8 | 8 | 12776.2300 | 0.5 | - | - |
|  | 1 | 9 | 10 | 12 |  | 7 | 8 | 10 | 12776.6849 | 4.6 | - | - |
|  | 1 | 9 | 10 | 8 |  | 7 | 8 | 6 | 12776.7186 | -2.8 | - | - |
|  | 1 | 9 | 12 | 14 |  | 7 | 10 | 12 | 12778.9956 b | 4.3 | - | - |
|  | 1 | 9 | 12 | 10 |  | 7 | 10 | 8 | 12778.9956 b | 3.5 | - | - |
|  | 1 | 9 | 10 | 8 |  | 9 | 8 | 6 | 12782.1183 | 2.9 | - | - |
|  | 1 | 9 | 10 | 12 |  | 9 | 8 | 10 | 12782.1798 | 0.3 | - | - |
|  | 1 | 9 | 10 | 10 |  | 9 | 8 | 8 | 12782.2920 | -0.2 | - | - |
|  | 1 | 9 | 12 | 14 |  | 9 | 12 | 14 | 12782.8505 | -0.5 | - | - |
|  | 1 | 9 | 12 | 12 |  | 9 | 12 | 12 | 12782.8757 | 2.8 | - | - |
|  | 1 | 9 | 6 | 6 |  | 7 | 4 | 4 | 12783.2228 | 0.1 | - | - |
|  | 1 | 9 | 6 | 8 |  | 7 | 4 | 6 | 12783.4507 | 2.3 | - | - |
|  | 1 | 9 | 6 | 4 |  | 7 | 4 | 2 | 12783.5064 | -3.8 | - | - |
|  | 1 | 9 | 8 | 6 |  | 7 | 6 | 4 | 12783.7175 | 4.4 | - | - |
|  | 1 | 9 | 6 | 10 |  | 7 | 6 | 8 | 12783.7556 | -2.1 | - | - |
|  | 1 | 9 | 6 | 8 |  | 7 | 6 | 6 | 12783.8476 | 2.2 | - | - |
|  | 1 | 9 | 10 | 12 |  | 9 | 10 | 12 | 12785.5763 | 2.3 | - | - |
|  | 1 | 9 | 12 | 14 |  | 9 | 10 | 12 | 12792.1944 | 2.0 | - | - |
|  | 0 | 9 | 8 | 8 |  | 7 | 6 | 6 | 12796.1193 | -4.8 | - | - |
|  | 0 | 9 | 8 | 6 |  | 7 | 6 | 4 | 12796.6680 b | 5.3 | - | - |
|  | 0 | 9 | 8 | 10 |  | 7 | 6 | 8 | 12796.6680 b | -1.2 | - | - |
|  | 0 | 9 | 10 | 10 |  | 7 | 8 | 8 | 12799.2646 | 4.1 | - | - |
|  | 0 | 9 | 10 | 12 |  | 7 | 8 | 10 | 12799.6254 | 6.1 | - | - |
|  | 0 | 9 | 10 | 8 |  | 7 | 8 | 6 | 12799.6763 | -7.7 | - | - |
|  | 0 | 9 | 12 | 12 |  | 7 | 10 | 10 | 12802.1537 | 2.1 | - | - |
|  | 0 | 9 | 12 | 14 |  | 7 | 10 | 12 | 12802.2425 b | 1.0 | - | - |
|  | 0 | 9 | 12 | 10 |  | 7 | 10 | 8 | 12802.2425 b | -1.2 | - | - |
|  | 0 | 9 | 6 | 6 |  | 7 | 4 | 4 | 12805.7136 | 0.6 | - | - |
|  | 0 | 9 | 6 | 8 |  | 7 | 4 | 6 | 12805.9125 b | 0.9 | - | - |
|  | 0 | 9 | 6 | 4 |  | 7 | 4 | 2 | 12805.9125 b | -2.3 | - | - |
|  | 0 | 9 | 8 | 10 |  | 9 | 6 | 8 | 12818.5531 | 2.9 | - | - |
|  | 1 | 11 | 12 | 12 |  | 7 | 10 | 10 | 12821.7318 | -0.4 | - | - |
|  | 1 | 11 | 12 | 10 |  | 7 | 10 | 8 | 12821.9683 | 1.5 | - | - |
|  | 1 | 11 | 12 | 14 |  | 7 | 10 | 12 | - | - | 12456.9549 | -1.5 |
|  | 0 | 9 | 12 | 14 |  | 9 | 12 | 14 | 12823.0120 b | 0.6 | - | - |
|  | 0 | 9 | 12 | 10 |  | 9 | 12 | 10 | 12823.0120 b | -2.5 | 12457.1458 | 2.9 |
|  | 1 | 11 | 8 | 8 |  | 9 | 6 | 6 | 12830.1955 | -0.3 | - | - |
|  | 1 | 11 | 8 | 10 |  | 9 | 6 | 8 | 12830.6693 | -0.6 | - | - |
|  | 1 | 11 | 10 | 12 |  | 9 | 8 | 10 | 12833.5337 | -4.3 | 12466.5859 b | 2.9 |

Table S1 (continued)

| *J*'*J*" | *K* | 2*F*1' | 2*F*2' | 2*F*' |  | 2*F*1" | 2*F*2" | 2*F*" |  | |  | |
| --- | --- | --- | --- | --- | --- | --- | --- | --- | --- | --- | --- | --- |
| 43 | 1 | 11 | 10 | 10 |  | 9 | 8 | 8 | 12833.5405 | -5.5 | 12466.5859 b | -0.6 |
|  | 1 | 11 | 14 | 14 |  | 9 | 12 | 12 | 12834.6423 | -0.1 | - | - |
|  | 1 | 11 | 12 | 12 |  | 9 | 10 | 10 | 12834.7311 | -2.7 | - | - |
|  | 1 | 11 | 14 | 16 |  | 9 | 12 | 14 | 12834.8269 | 0.5 | - | - |
|  | 1 | 11 | 12 | 14 |  | 9 | 10 | 12 | 12835.1632 | 1.3 | - | - |
|  | 1 | 3 | 6 | 6 |  | 1 | 4 | 4 | 12839.8451 | 3.8 | - | - |
|  | 1 | 3 | 6 | 8 |  | 1 | 4 | 6 | 12840.1906 | -4.6 | - | - |
|  | 0 | 13 | 12 | 12 |  | 11 | 10 | 10 | 12857.4968 | 0.7 | 12491.0422 | -2.3 |
|  | 0 | 13 | 12 | 14 |  | 11 | 10 | 12 | 12857.5872 | -1.7 | 12491.1361 | -0.2 |
|  | 0 | 13 | 14 | 14 |  | 11 | 12 | 12 | 12857.8819 | 3.0 | 12491.3478 | 0.8 |
|  | 0 | 13 | 14 | 12 |  | 11 | 12 | 10 | 12857.9557 b | 2.8 | 12491.4205 | -0.1 |
|  | 0 | 13 | 14 | 16 |  | 11 | 12 | 14 | 12857.9557 b | -4.1 | - | - |
|  | 0 | 13 | 10 | 10 |  | 11 | 8 | 8 | 12858.3317 | 1.8 | - | - |
|  | 0 | 13 | 16 | 16 |  | 11 | 14 | 14 | 12858.7604 | 6.9 | 12492.0402 | 4.2 |
|  | 0 | 13 | 16 | 18 |  | 11 | 14 | 16 | - | - | 12492.1000 | -1.9 |
|  | 0 | 11 | 10 | 10 |  | 9 | 8 | 8 | 12875.6664 | 8.0 | - | - |
|  | 0 | 11 | 10 | 8 |  | 9 | 8 | 6 | 12875.7150 | -2.9 | 12509.1732 b | -0.4 |
|  | 0 | 11 | 10 | 12 |  | 9 | 8 | 10 | - | - | 12509.1732 b | -1.5 |
|  | 0 | 11 | 12 | 12 |  | 9 | 10 | 10 | 12877.0217 | 1.2 | - | - |
|  | 0 | 11 | 12 | 14 |  | 9 | 10 | 12 | 12877.3941 | -2.5 | 12510.2039 | 0.3 |
|  | 0 | 11 | 14 | 14 |  | 9 | 12 | 12 | 12877.7101 | -4.4 | 12510.8058 | -0.2 |
|  | 0 | 11 | 14 | 16 |  | 9 | 12 | 14 | - | - | 12510.9951 | 0.8 |
|  | 0 | 11 | 14 | 12 |  | 9 | 12 | 10 | - | - | 12511.0237 | 3.8 |
|  | 1 | 13 | 14 | 14 |  | 11 | 12 | 12 | 12880.5722 | 0.3 | 12514.2964 | 1.7 |
|  | 1 | 13 | 12 | 12 |  | 11 | 10 | 10 | 12880.6608 | 2.0 | 12514.3635 | -2.4 |
|  | 1 | 13 | 14 | 16 |  | 11 | 12 | 14 | 12880.7226 | -1.8 | 12514.4497 b | 2.4 |
|  | 1 | 13 | 14 | 12 |  | 11 | 12 | 10 | 12880.7291 | -1.6 | 12514.4497 b | -2.8 |
|  | 1 | 13 | 12 | 14 |  | 11 | 10 | 12 | 12880.8227 b | 7.3 | 12514.5219 | 0.9 |
|  | 1 | 13 | 12 | 10 |  | 11 | 10 | 8 | 12880.8227 b | -0.5 | - | - |
|  | 1 | 13 | 16 | 16 |  | 11 | 14 | 14 | 12882.8859 | 3.6 | 12516.1194 | 1.1 |
|  | 1 | 13 | 10 | 10 |  | 11 | 8 | 8 | - | - | 12516.1657 | -3.7 |
|  | 1 | 13 | 16 | 18 |  | 11 | 14 | 16 | 12883.0356 b | 5.4 | - | - |
|  | 1 | 13 | 16 | 14 |  | 11 | 14 | 12 | 12883.0356 b | -1.5 | 12516.2715 | -1.4 |
|  | 1 | 13 | 10 | 12 |  | 11 | 8 | 10 | 12883.0941 b | -5.4 | - | - |
|  | 1 | 13 | 10 | 8 |  | 11 | 8 | 6 | 12883.0941 b | -7.0 | - | - |
|  | 1 | 7 | 10 | 12 |  | 7 | 10 | 12 | - | - | 12599.4358 | 0.7 |
|  | 0 | 7 | 8 | 10 |  | 7 | 8 | 10 | - | - | 12652.8241 | -3.1 |
|  | 0 | 7 | 10 | 10 |  | 7 | 10 | 10 | - | - | 12654.1331 | 0.6 |
|  | 1 | 5 | 8 | 10 |  | 5 | 8 | 10 | - | - | 12665.9039 | -1.3 |
|  | 0 | 5 | 8 | 10 |  | 5 | 8 | 10 | - | - | 12702.5810 | 0.3 |

a =obs-calc.

b Unresolved lines are treated as a blended line in the fitting program (Ref. 8).

**Table S2** Observed and calculated rotational transition frequencies of H315NI35Cl.

| *J*'*J*" | *K* | 2*F*1' | 2*F*' |  | 2*F*1" | 2*F*" |  | |
| --- | --- | --- | --- | --- | --- | --- | --- | --- |
| 32 | 0 | 5 | 6 |  | 3 | 4 | 9151.6610 | 1.7 |
|  | 0 | 5 | 8 |  | 3 | 6 | 9161.7679 | -0.1 |
|  | 1 | 5 | 8 |  | 3 | 6 | 9240.6414 | -1.4 |
|  | 1 | 7 | 8 |  | 5 | 6 | 9266.4863 | 0.3 |
|  | 1 | 7 | 10 |  | 5 | 8 | 9273.8468 | 1.9 |
|  | 0 | 7 | 8 |  | 5 | 6 | 9276.7793 | 1.6 |
|  | 0 | 7 | 6 |  | 5 | 4 | 9283.7281 | 1.5 |
|  | 0 | 7 | 10 |  | 5 | 8 | 9285.6263 | -0.7 |
|  | 1 | 7 | 6 |  | 7 | 4 | 9324.3314 | -1.3 |
|  | 1 | 9 | 10 |  | 7 | 8 | 9324.6452 | 0.8 |
|  | 1 | 9 | 8 |  | 7 | 6 | 9326.7931 | -0.5 |
|  | 1 | 9 | 12 |  | 7 | 10 | 9330.8901 | 2.9 |
|  | 1 | 7 | 8 |  | 7 | 8 | 9333.6592 | 0.7 |
|  | 0 | 11 | 10 |  | 9 | 8 | 9426.2348 | -0.1 |
|  | 0 | 11 | 12 |  | 9 | 10 | 9426.5913 | -1.5 |
|  | 0 | 11 | 8 |  | 9 | 6 | 9427.8217 | 0.6 |
|  | 0 | 11 | 14 |  | 9 | 12 | 9428.2170 | 1.4 |
|  | 0 | 9 | 10 |  | 7 | 8 | 9450.0332 | 1.6 |
|  | 0 | 9 | 8 |  | 7 | 6 | 9452.8723 | -1.8 |
|  | 0 | 9 | 6 |  | 7 | 4 | 9455.8527 | -0.5 |
|  | 0 | 9 | 12 |  | 7 | 10 | 9457.5942 | 1.6 |
|  | 1 | 11 | 12 |  | 9 | 10 | 9474.4599 | 0.5 |
|  | 1 | 11 | 10 |  | 9 | 8 | 9475.3365 | 3.6 |
|  | 0 | 7 | 8 |  | 7 | 8 | 9476.1295 | -0.9 |
|  | 0 | 7 | 10 |  | 7 | 10 | 9478.9140 | -5.0 |
|  | 1 | 7 | 14 |  | 9 | 12 | 9479.2907 | -0.1 |
|  | 1 | 7 | 8 |  | 9 | 6 | 9480.1760 | -3.0 |
|  | 1 | 5 | 8 |  | 5 | 10 | 9491.0102 | 2.2 |
|  | 1 | 3 | 6 |  | 3 | 6 | 9508.5174 | -2.0 |
|  | 0 | 3 | 6 |  | 3 | 6 | 9512.3305 | 0.1 |
|  | 0 | 5 | 8 |  | 5 | 8 | 9567.7061 | -4.1 |
| 43 | 1 | 9 | 8 |  | 7 | 6 | 12467.2280 | 3.4 |
|  | 1 | 9 | 10 |  | 9 | 10 | 12468.9921 | -7.1 |
|  | 0 | 9 | 10 |  | 7 | 8 | 12482.8261 | -6.3 |
|  | 0 | 9 | 12 |  | 7 | 10 | 12485.5274 | 1.5 |
|  | 0 | 9 | 8 |  | 9 | 6 | 12502.3044 | -2.4 |
|  | 1 | 11 | 12 |  | 7 | 10 | 12505.2025 | -3.1 |
|  | 0 | 9 | 12 |  | 9 | 12 | 12506.8548 | 2.5 |
|  | 0 | 9 | 10 |  | 9 | 10 | 12508.9348 | 3.6 |
|  | 1 | 11 | 8 |  | 9 | 6 | 12513.8689 | 0.9 |
|  | 1 | 11 | 10 |  | 9 | 8 | 12516.8555 | -1.5 |
|  | 1 | 11 | 14 |  | 9 | 12 | 12518.1135 | -0.7 |
|  | 1 | 11 | 12 |  | 9 | 10 | 12518.3740 | -1.9 |
|  | 0 | 13 | 12 |  | 11 | 10 | 12541.0617 | 8.5 |

| *J*'*J*" | *K* | *F*1' | *F*' |  | *F*1" | *F*" |  | |
| --- | --- | --- | --- | --- | --- | --- | --- | --- |
|  | 0 | 13 | 14 |  | 11 | 12 | 12541.4246 | -2.5 |
|  | 0 | 13 | 10 |  | 11 | 8 | 12541.8780 | -3.5 |
|  | 0 | 13 | 16 |  | 11 | 14 | 12542.2930 | 0.2 |
|  | 0 | 11 | 10 |  | 9 | 8 | 12559.1609 | 2.0 |
|  | 0 | 11 | 12 |  | 9 | 10 | 12560.7459 | 2.5 |
|  | 0 | 11 | 14 |  | 9 | 12 | 12561.3294 | 0.1 |
|  | 1 | 13 | 14 |  | 11 | 12 | 12564.2290 | -3.7 |
|  | 1 | 13 | 12 |  | 11 | 10 | 12564.3272 | 4.5 |
|  | 0 | 11 | 8 |  | 9 | 6 | 12566.2980 | -1.3 |
|  | 1 | 13 | 16 |  | 11 | 14 | 12566.5434 | 0.4 |
|  | 1 | 13 | 10 |  | 11 | 8 | 12566.6069 | -3.2 |
|  | 0 | 7 | 10 |  | 7 | 10 | 12704.0559 | -1.5 |
|  | 1 | 5 | 8 |  | 5 | 8 | 12716.2862 | 8.4 |

a =obs-calc.
